# Supplementary material for: Deactivation and regeneration of carbon supported Pt and Ru catalysts in aqueous phase hydrogenation of 2-pentanone
Source: Royal Society of Chemistry journal article supplement (doi:10.1039/d0cy00163e), 2020-01-01
Supplement: d0cy00163e1.pdf [file d0cy00163e1.pdf]

Supplementary Information

**Deactivation and regeneration of carbon supported Pt and Ru catalysts in aqueous phase hydrogenation of 2-pentanone**

Jiajie Huo,<sup>ab</sup> Hien N. Pham,<sup>bc</sup> Yan Cheng,<sup>ab</sup> Hsi-Hsin Lin,<sup>ab</sup> Luke T. Roling,<sup>a</sup> Abhaya K. Datye,<sup>bc</sup>  
Brent H. Shanks<sup>ab\*</sup>

<sup>a</sup>Department of Chemical and Biological Engineering, Iowa State University, Ames, Iowa 50011,  
United States

<sup>b</sup>Center for Biorenewable Chemicals, Iowa State University, Ames, Iowa 50011, United States

<sup>c</sup>Department of Chemical and Biological Engineering and Center for Microengineered Materials,  
University of New Mexico, Albuquerque, New Mexico 87131, United States

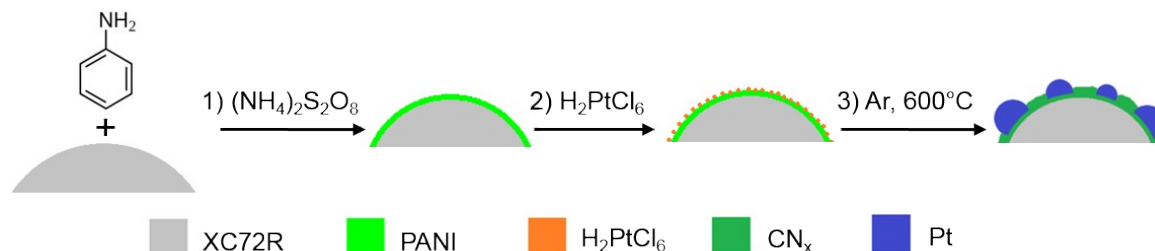

Figure S1. Synthesis procedure of Pt PANI XC72R including 1) polymerization, 2) incipient wetness impregnation of H<sub>2</sub>PtCl<sub>6</sub>, and 3) carbonization at 600 °C in argon for 1h.

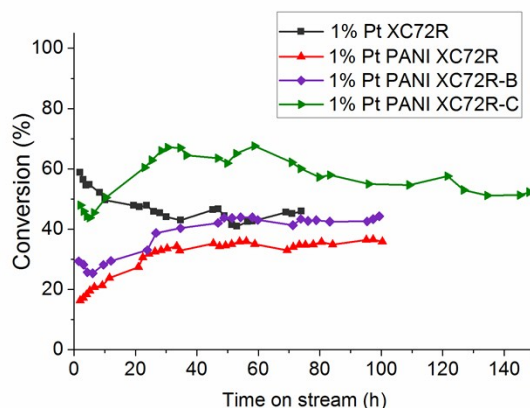

Figure S2. Catalytic conversion of aqueous phase hydrogenation of 2-pentanone at 180 °C, 40 mg of catalyst, and 0.08 mL/min 2-pentanone solution on carbon material with different PANI loadings. The XC72R and PANI coating weight ratio is 1% PANI XC72R (XC72R:PANI=4:1), 1% PANI XC72R-B (XC72R:PANI=8:1), 1% PANI XC72R-C (XC72R:PANI=16:1). Higher activity was observed when decreasing the PANI loading.

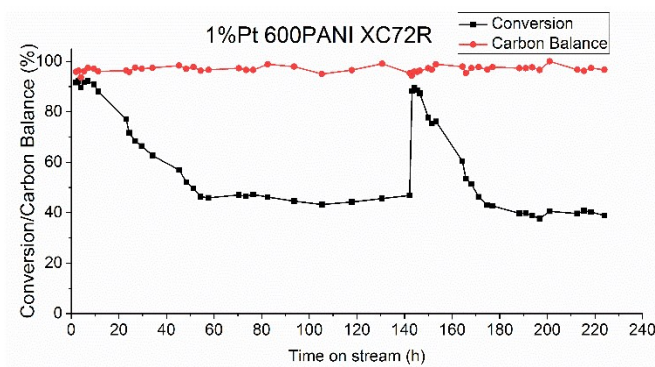

Figure S3. Catalytic conversion of aqueous phase hydrogenation of 2-pentanone at 180 °C, 40 mg of catalyst, and 0.08 mL/min 2-pentanone solution on 1% Pt 600PANI XC72R. 1% Pt PANI XC72R was synthesized by carbonization of PANI XC72R first at 600 °C followed by incipient wetness impregnation of H<sub>2</sub>PtCl<sub>6</sub> and H<sub>2</sub> reduction at 300 °C.

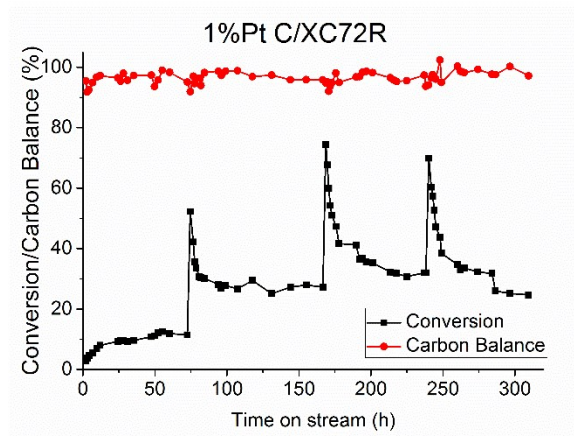

Figure S4. Catalytic conversion of aqueous phase hydrogenation of 2-pentanone at 180 °C, 40 mg of catalyst, and 0.08 mL/min 2-pentanone solution on 1% Pt C/XC72R, which was synthesized from glucose as a carbon source.

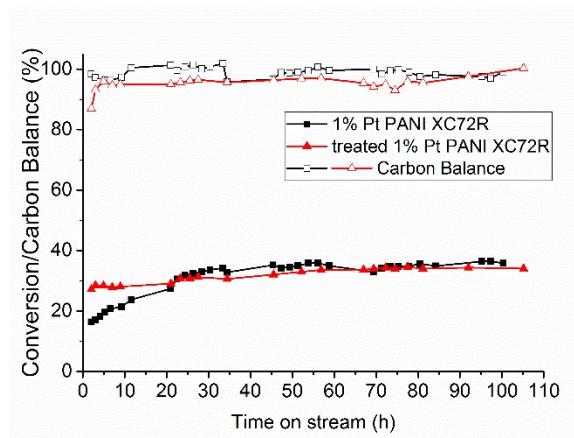

Figure S5. Catalytic conversion of aqueous phase hydrogenation of 2-pentanone to 2-pentanol at 180 °C, 40 mg of catalyst, and 0.08 mL/min 2-pentanone solution on 1% Pt PANI XC72R with and without in-situ water treatment at 180 °C for 24 h.

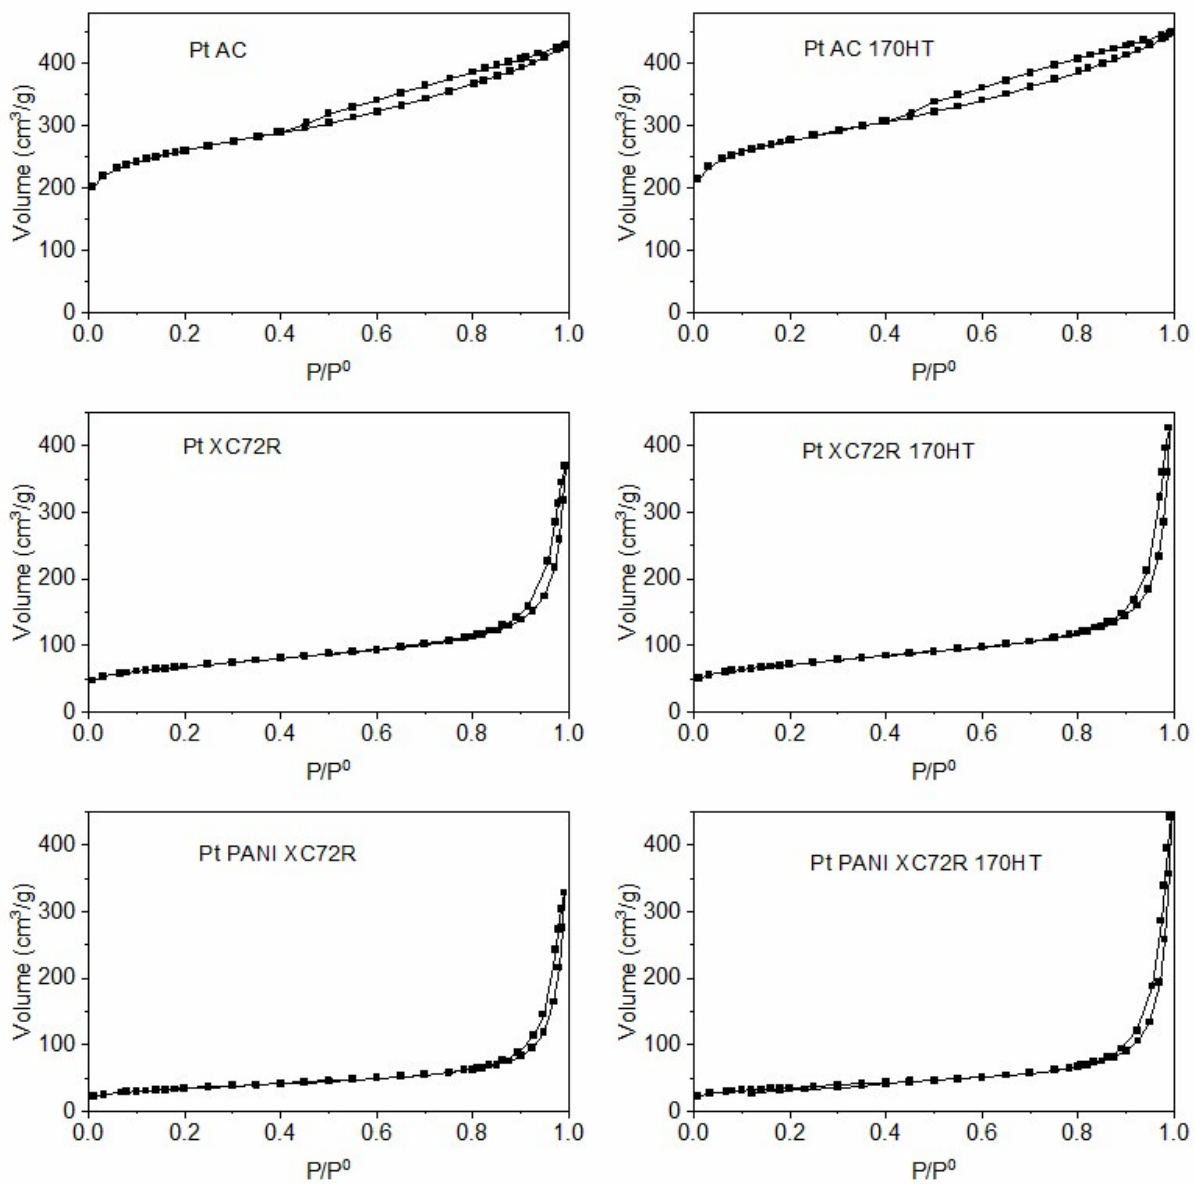

Figure S6. Nitrogen physisorption isotherms of Pt AC, Pt XC72R, and Pt PANI XC72R before and after hydrothermal treatment. Hydrothermal treatment (HT) was performed in pressurized water at 170 °C for 48 h.

Table S1. BET surface area, pore volume and pore diameter of Pt AC, Pt XC72R, and Pt PANI XC72R before and after hydrothermal treatment. Hydrothermal treatment (HT) was performed in pressurized water at 170 °C for 48 h.

| Sample name   |        | BET surface area (m <sup>2</sup> /g) | Total pore volume (cm <sup>3</sup> /g) | t-Plot micropore volume (cm <sup>3</sup> /g) | Mesopore volume (cm <sup>3</sup> /g) | BJH adsorption avg pore diameter (nm) |
|---------------|--------|--------------------------------------|----------------------------------------|----------------------------------------------|--------------------------------------|---------------------------------------|
| Pt XC72R      | fresh  | 239                                  | 0.335                                  | 0.034                                        | 0.301                                | 14.1                                  |
|               | 48h HT | 251                                  | 0.362                                  | 0.034                                        | 0.328                                | 15.7                                  |
| Pt PANI/XC72R | fresh  | 122                                  | 0.254                                  | 0.011                                        | 0.243                                | 21.7                                  |
|               | 48h HT | 125                                  | 0.299                                  | 0.015                                        | 0.284                                | 28.1                                  |
| Pt AC         | fresh  | 891                                  | 0.650                                  | 0.228                                        | 0.422                                | 4.9                                   |
|               | 48h HT | 947                                  | 0.680                                  | 0.245                                        | 0.435                                | 4.8                                   |

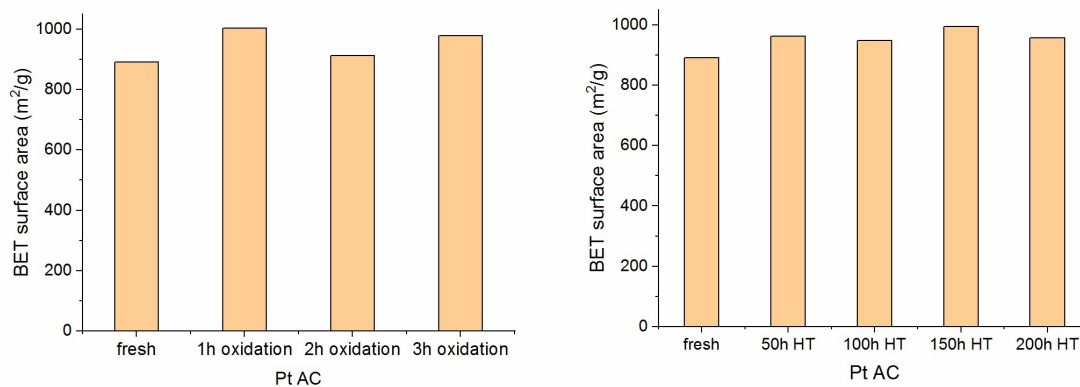

Figure S7. BET surface areas of 1% Pt AC after ex-situ oxidation in air at 200 °C for 1 , 2 , and 3 h (left); and after hydrothermal treatment at 200 °C for 50 , 100 , 150 , and 200 h (right).

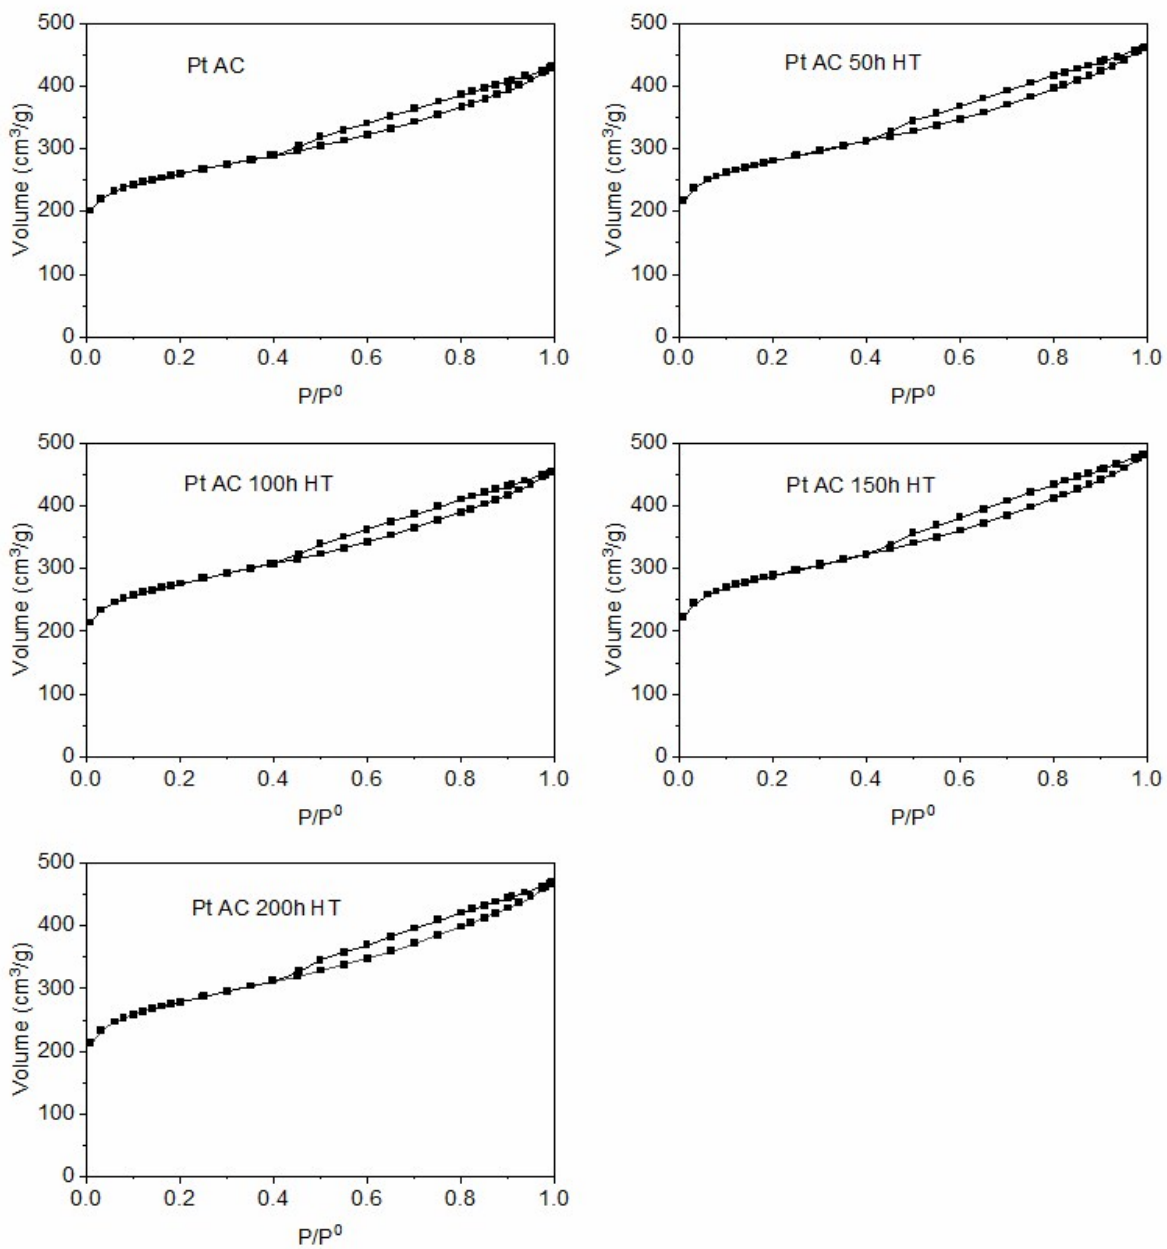

Figure S8. Nitrogen physisorption isotherms of Pt AC after 50, 100, 150, and 200 h of hydrothermal treatment at 200 °C.

Table S2. BET surface area, pore volume and pore diameter of 1% Pt AC after hydrothermal treatment (HT) at 200 °C for 50 , 100 , 150 , and 200 h.

| Pt AC   | BET surface area (m <sup>2</sup> /g) | Total pore volume (cm <sup>3</sup> /g) | t-Plot micropore volume (cm <sup>3</sup> /g) | Mesopore volume (cm <sup>3</sup> /g) | BJH adsorption avg pore diameter (nm) |
|---------|--------------------------------------|----------------------------------------|----------------------------------------------|--------------------------------------|---------------------------------------|
| fresh   | 891                                  | 0.650                                  | 0.228                                        | 0.422                                | 4.9                                   |
| 50h HT  | 962                                  | 0.699                                  | 0.246                                        | 0.453                                | 4.9                                   |
| 100h HT | 948                                  | 0.689                                  | 0.241                                        | 0.448                                | 4.8                                   |
| 150h HT | 994                                  | 0.730                                  | 0.250                                        | 0.480                                | 4.9                                   |
| 200h HT | 957                                  | 0.709                                  | 0.234                                        | 0.475                                | 4.8                                   |

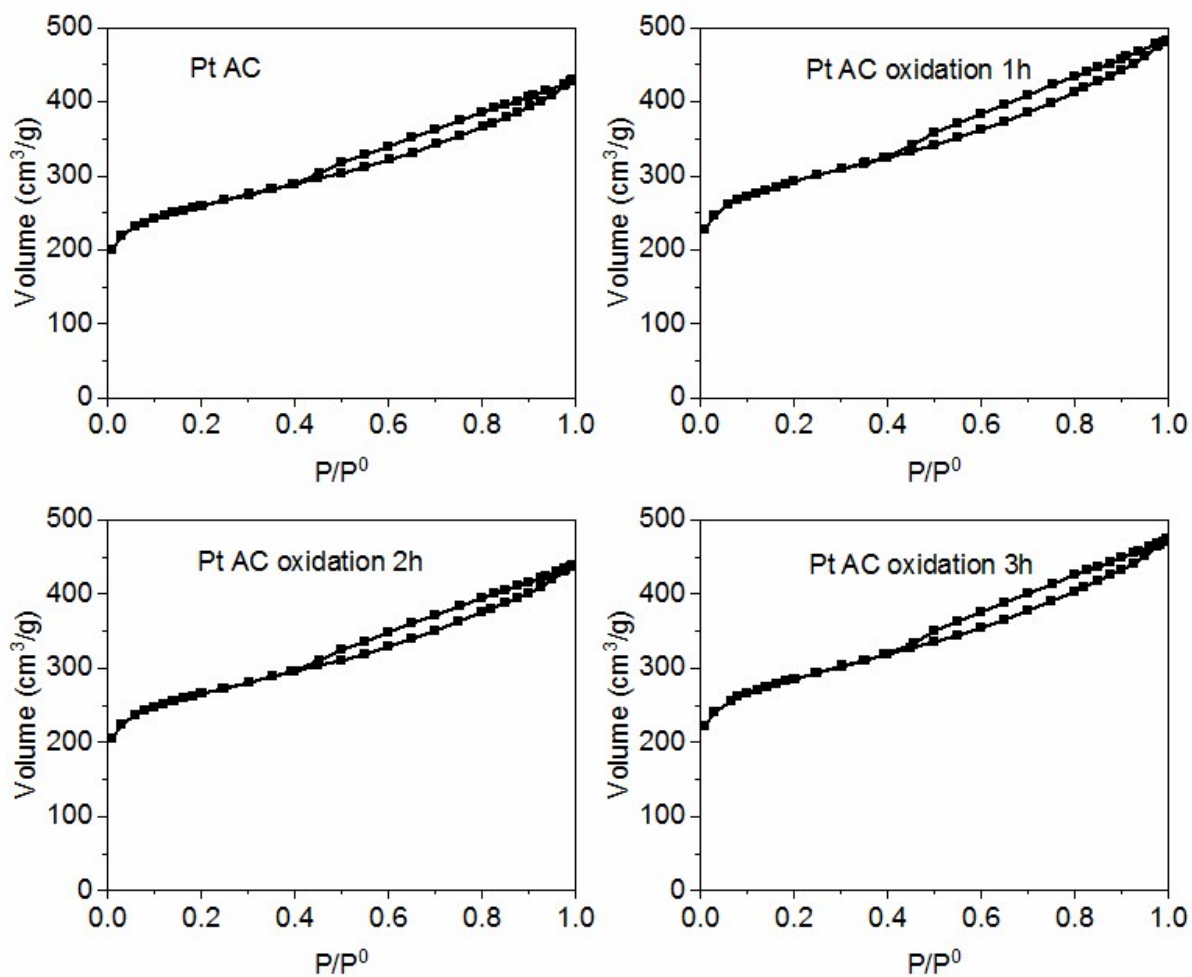

Figure S9. Nitrogen physisorption isotherms of Pt AC after 1, 2, and 3 h of air oxidation at 200 °C.

Table S3. BET surface area, pore volume and pore diameter of Pt AC after 1h, 2h, and 3h of oxidation in air at 200 °C.

| Pt AC        | BET surface area (m <sup>2</sup> /g) | Total pore volume (cm <sup>3</sup> /g) | t-Plot micropore volume (cm <sup>3</sup> /g) | Mesopore volume (cm <sup>3</sup> /g) | BJH adsorption avg pore diameter (nm) |
|--------------|--------------------------------------|----------------------------------------|----------------------------------------------|--------------------------------------|---------------------------------------|
| fresh        | 891                                  | 0.650                                  | 0.228                                        | 0.422                                | 4.9                                   |
| 1h oxidation | 1003                                 | 0.732                                  | 0.256                                        | 0.476                                | 4.9                                   |
| 2h oxidation | 912                                  | 0.665                                  | 0.234                                        | 0.431                                | 4.9                                   |
| 3h oxidation | 979                                  | 0.716                                  | 0.251                                        | 0.465                                | 4.9                                   |

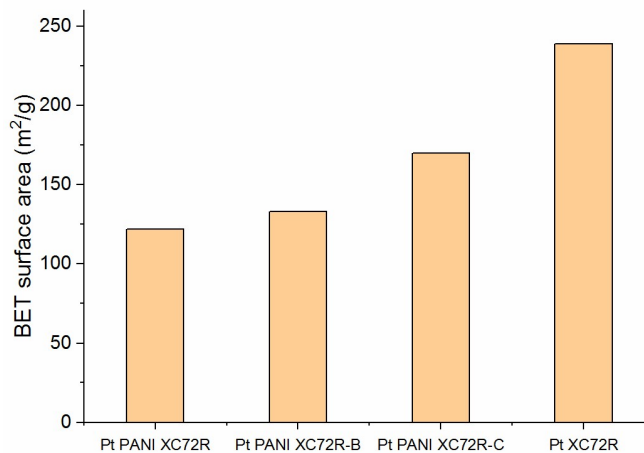

Figure S10. BET surface area of Pt PANI XC72R materials with different PANI coating amount. The XC72R and PANI coating weight ratio is 1% Pt PANI XC72R (XC72R:PANI=4:1), 1% Pt PANI XC72R-B (XC72R:PANI=8:1), 1% Pt PANI XC72R-C (XC72R:PANI=16:1).



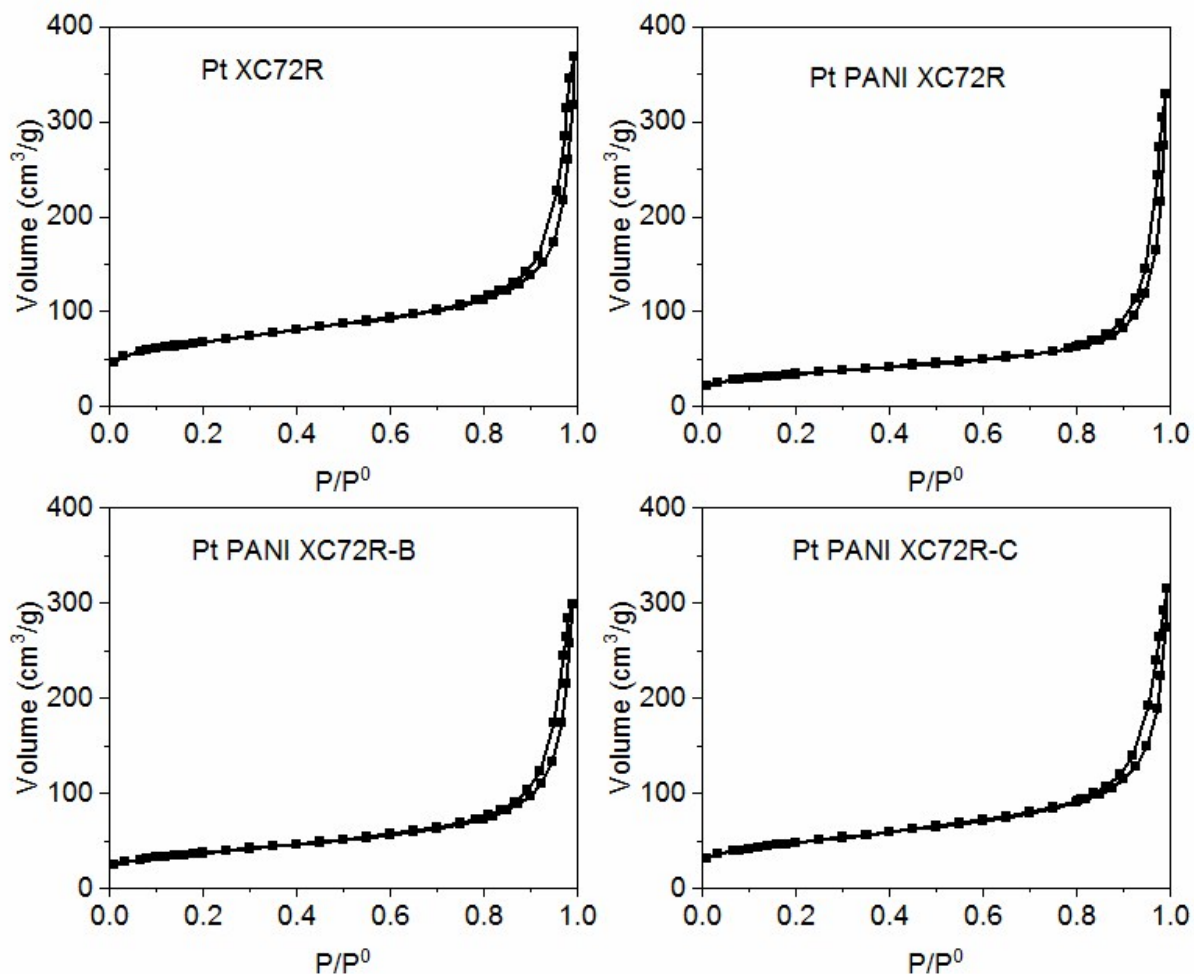

Figure S11. Nitrogen physisorption isotherms of Pt XC72R and Pt PANI XC72R with different PANI loading. 1% Pt PANI XC72R (PANI:XC72R=1:4); 1% Pt PANI XC72R-B (PANI:XC72R=1:8); 1% Pt PANI XC72R-C (PANI:XC72R=1:16).

Table S4. BET surface area, pore volume and pore diameter of Pt XC72R and Pt PANI XC72R with different PANI loading. 1% Pt PANI XC72R (PANI:XC72R=1:4); 1% Pt PANI XC72R-B (PANI:XC72R=1:8); 1% Pt PANI XC72R-C (PANI:XC72R=1:16).

|                 | BET surface area (m <sup>2</sup> /g) | Total pore volume (cm <sup>3</sup> /g) | t-Plot micropore volume (cm <sup>3</sup> /g) | Mesopore volume (cm <sup>3</sup> /g) | BJH adsorption avg pore diameter (nm) |
|-----------------|--------------------------------------|----------------------------------------|----------------------------------------------|--------------------------------------|---------------------------------------|
| Pt XC72R        | 239                                  | 0.335                                  | 0.034                                        | 0.301                                | 14.1                                  |
| Pt PANI XC72R   | 122                                  | 0.254                                  | 0.011                                        | 0.243                                | 21.7                                  |
| Pt PANI XC72R-B | 133                                  | 0.269                                  | 0.011                                        | 0.258                                | 16.6                                  |
| Pt PANI XC72R-C | 170                                  | 0.292                                  | 0.014                                        | 0.278                                | 14.2                                  |

Table S5. CO chemisorption data of fresh and hydrothermally treated 1% Pt AC at 200 °C after 50, 100, 150, and 200 h. HT refers to hydrothermal treatment.

| Sample name                  | CO uptake<br>$\mu\text{mol/g}$ | Dispersion<br>/% | Particle<br>size <sup>a</sup> /nm |
|------------------------------|--------------------------------|------------------|-----------------------------------|
| Pt AC                        | 22.4                           | 44               | 2.6                               |
| Pt AC 50 h HT                | 15.6                           | 31               | 3.7                               |
| Pt AC 100 h HT               | 13.0                           | 25               | 4.5                               |
| Pt AC 150 h HT               | 12.9                           | 25               | 4.5                               |
| Pt AC 200 h HT               | 10.2                           | 20               | 5.7                               |
| Pt AC 200 h HT 1st oxidation | 13.6                           | 26               | 4.3                               |
| Pt AC 200 h HT 2nd oxidation | 14.3                           | 28               | 4.1                               |
| Pt AC 200 h HT 3rd oxidation | 14.0                           | 27               | 4.2                               |

<sup>a</sup> Particle size =  $1.13/\text{Dispersion}$ . The Micromeritics ASAP software built-in value of density of Pt (21.45  $\text{g/cm}^3$ ), cross sectional area of Pt (0.08  $\text{nm}^2$ ) was used for the calculation.[1]

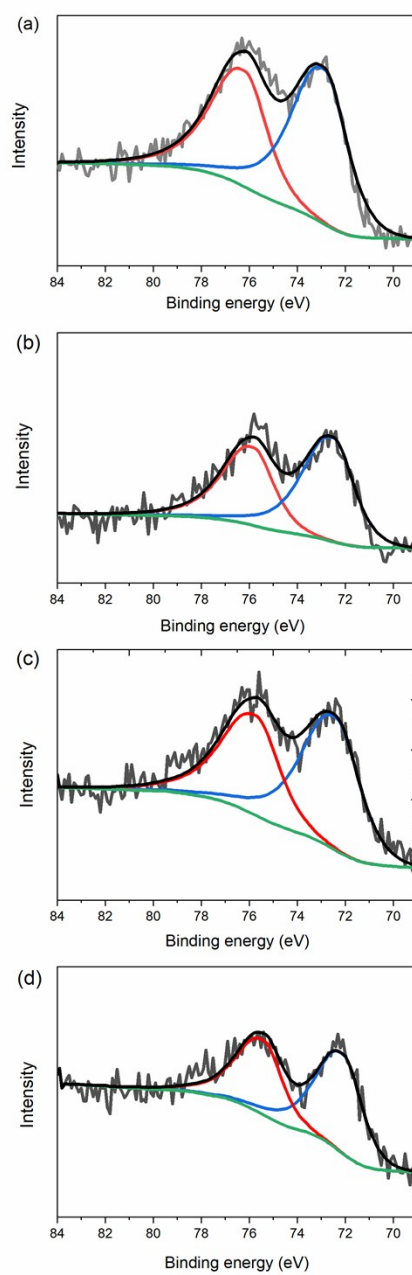

Figure S12. XPS spectra of Pt 4f on (a) fresh 1% Pt AC, (b) spent 1% Pt AC, (c) spent 1% Pt AC after oxidation, (d) spent 1% Pt AC after oxidation and reduction.

#### Reference

- [1]. *Micromeritics AutoChem 2920 Automated Catalyst Characterization System Operator's Manual*, V4.00 edn., 2009.
